# Supplementary material for: A systematic review of factors influencing participation in two types of malaria prevention intervention in Southeast Asia
Source: Springer Nature journal article supplement (doi:10.1186/s12936-021-03733-y), 2021-04-20
Supplement: MOESM1 [file 19087230]

## Additional File 1

### Supplementary Table: Scoping Review Search Terms

| #  | Searches                                                                                                                                                                                                                       | Notes                                     |
|----|--------------------------------------------------------------------------------------------------------------------------------------------------------------------------------------------------------------------------------|-------------------------------------------|
| 1  | malaria/ or plasmodium vivax malaria/ or malaria falciparum/                                                                                                                                                                   |                                           |
| 2  | malaria control/                                                                                                                                                                                                               |                                           |
| 3  | malaria control.mp.                                                                                                                                                                                                            |                                           |
| 4  | Plasmodium falciparum/                                                                                                                                                                                                         |                                           |
| 5  | plasmodium falciparum.mp.                                                                                                                                                                                                      |                                           |
| 6  | malaria.mp. [mp=title, abstract, heading word, drug trade name, original title, device manufacturer, drug manufacturer, device trade name, keyword, floating subheading word, candidate term word]                             | Search terms for malaria                  |
| 7  | paludism*.mp. [mp=title, abstract, heading word, drug trade name, original title, device manufacturer, drug manufacturer, device trade name, keyword, floating subheading word, candidate term word]                           |                                           |
| 8  | bed net/ or insecticide treated net/                                                                                                                                                                                           |                                           |
| 9  | bed net*.mp. [mp=title, abstract, heading word, drug trade name, original title, device manufacturer, drug manufacturer, device trade name, keyword, floating subheading word, candidate term word]                            |                                           |
| 10 | bednet*.mp. [mp=title, abstract, heading word, drug trade name, original title, device manufacturer, drug manufacturer, device trade name, keyword, floating subheading word, candidate term word]                             |                                           |
| 11 | mosquito net*.mp. [mp=title, abstract, heading word, drug trade name, original title, device manufacturer, drug manufacturer, device trade name, keyword, floating subheading word, candidate term word]                       | Search terms for ITNs                     |
| 12 | treated net*.mp. [mp=title, abstract, heading word, drug trade name, original title, device manufacturer, drug manufacturer, device trade name, keyword, floating subheading word, candidate term word]                        |                                           |
| 13 | (interceptor and (bednet* or net*)).mp. [mp=title, abstract, heading word, drug trade name, original title, device manufacturer, drug manufacturer, device trade name, keyword, floating subheading word, candidate term word] |                                           |
| 14 | 8 or 9 or 10 or 11 or 12 or 13                                                                                                                                                                                                 | Bed net concept                           |
| 15 | mass drug administration/                                                                                                                                                                                                      |                                           |
| 16 | mass drug administration.mp.                                                                                                                                                                                                   |                                           |
| 17 | exp antimalarial agent/                                                                                                                                                                                                        |                                           |
| 18 | antimalaria*.mp. [mp=title, abstract, heading word, drug trade name, original title, device manufacturer, drug manufacturer, device trade name, keyword, floating subheading word, candidate term word]                        | Search terms for mass drug administration |
| 19 | anti-malaria*.mp. [mp=title, abstract, heading word, drug trade name, original title, device manufacturer, drug manufacturer, device trade name, keyword, floating subheading word, candidate term word]                       |                                           |
| 20 | infection prevention/                                                                                                                                                                                                          |                                           |
| 21 | drug therapy/ or chemoprophylaxis/                                                                                                                                                                                             |                                           |
| 22 | exp southeast asian/                                                                                                                                                                                                           |                                           |
| 23 | southeast asian.mp.                                                                                                                                                                                                            |                                           |
| 24 | exp Southeast Asia/                                                                                                                                                                                                            |                                           |
| 25 | south east asia.mp.                                                                                                                                                                                                            |                                           |
| 26 | Viet Nam/                                                                                                                                                                                                                      |                                           |
| 27 | Viet Nam.mp.                                                                                                                                                                                                                   |                                           |
| 28 | Cambodia/                                                                                                                                                                                                                      |                                           |
| 29 | Cambodia.mp.                                                                                                                                                                                                                   |                                           |
| 30 | Myanmar/                                                                                                                                                                                                                       |                                           |
| 31 | Myanmar.mp.                                                                                                                                                                                                                    |                                           |
| 32 | Burma.mp.                                                                                                                                                                                                                      |                                           |
| 35 | Laos/                                                                                                                                                                                                                          |                                           |
| 36 | Laos.mp.                                                                                                                                                                                                                       | Search terms for Southeast Asia           |
| 37 | Thailand/                                                                                                                                                                                                                      |                                           |
| 38 | Thailand.mp.                                                                                                                                                                                                                   |                                           |
| 39 | Brunei Darussalam/                                                                                                                                                                                                             |                                           |
| 40 | Brunei Darussalam.mp.                                                                                                                                                                                                          |                                           |
| 41 | Indonesia/                                                                                                                                                                                                                     |                                           |
| 42 | Indonesia.mp.                                                                                                                                                                                                                  |                                           |
| 45 | Timor-Leste/                                                                                                                                                                                                                   |                                           |
| 46 | Timor-Leste.mp.                                                                                                                                                                                                                |                                           |
| 47 | Malaysia/                                                                                                                                                                                                                      |                                           |
| 48 | Malaysia.mp.                                                                                                                                                                                                                   |                                           |
| 49 | Greater Mekong*.mp.                                                                                                                                                                                                            |                                           |

|    |                                                                                                                                                                      |                   |
|----|----------------------------------------------------------------------------------------------------------------------------------------------------------------------|-------------------|
| 50 | 22 or 23 or 24 or 25 or 26 or 27 or 28 or 29 or 30 or 31 or 32 or 33 or 34 or 35 or 36 or 37 or 38 or 39 or 40 or 41 or 42 or 43 or 44 or 45 or 46 or 47 or 48 or 49 | Country concept   |
| 51 | 1 or 2 or 3 or 4 or 5 or 6 or 7                                                                                                                                      | Malaria concept   |
| 52 | 15 or 16 or 17 or 18 or 19 or 20                                                                                                                                     | Drug concept      |
| 53 | 14 and 50 and 51                                                                                                                                                     | Full net concept  |
| 54 | 50 and 51 and 52                                                                                                                                                     | Full drug concept |
